# Supplementary material
Source: Springer Nature journal article supplement (https://www.springermedizin.de/resource/supplementary/12904_2010_93_MOESM1_ESM.pdf/9518092)

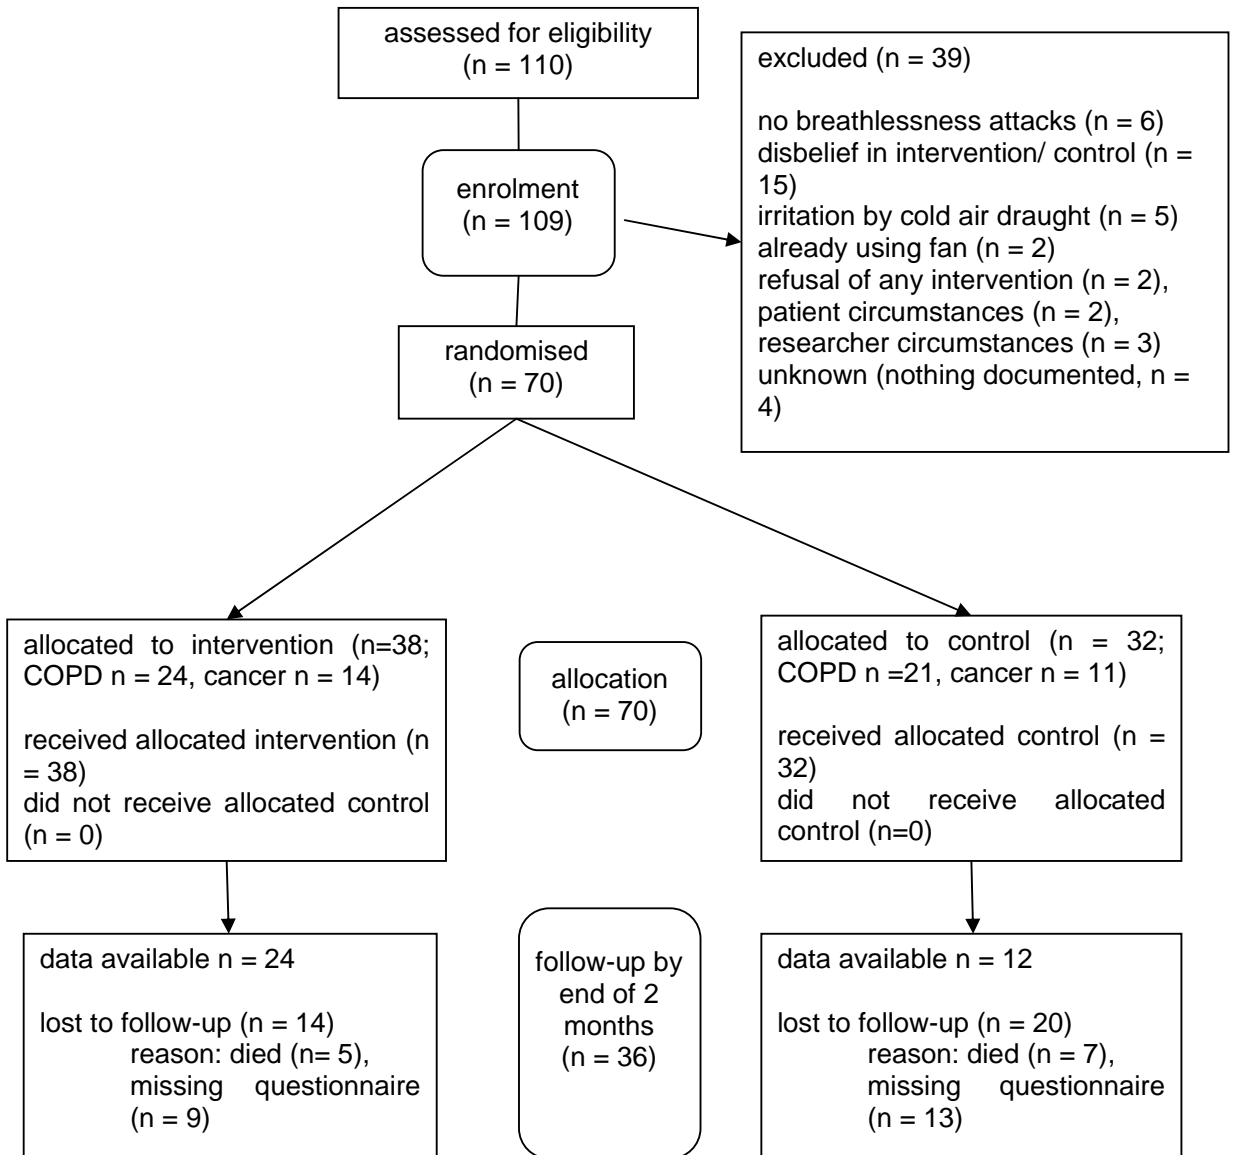

Supplement: MOESM1 [file 9518092]
